# Supplementary material for: Discrimination of cis-diol-containing molecules using fluorescent boronate affinity probes by principal component analysis
Source: Royal Society of Chemistry journal article supplement (doi:10.1039/d3ay01719b), 2023-01-01
Supplement: d3ay01719b1.pdf [file d3ay01719b1.pdf]

## Electronic Supporting Information

*for*

### **Discrimination of *cis*-diol containing molecules via fluorescent boronate affinity probes by principal component analysis**

Fenyng Wang<sup>a,\*</sup>, Shuqing Xiong<sup>b</sup>, Tingting Wang<sup>b</sup>, Yadan Hou<sup>b</sup>, and Qianjin Li<sup>b,\*</sup>

<sup>a</sup> School of Chemistry and Chemical Engineering, Nanchang University, Nanchang 330031, China

<sup>b</sup> School of Food Science and Pharmaceutical Engineering, Nanjing Normal University, Nanjing 210023, China

\*Emails of corresponding authors:

Fenyng Wang: [wangfenying@ncu.edu.cn](mailto:wangfenying@ncu.edu.cn)

Qianjin Li: [liqianjinnju@163.com](mailto:liqianjinnju@163.com) & [qianjin\\_li@njnu.edu.cn](mailto:qianjin_li@njnu.edu.cn)

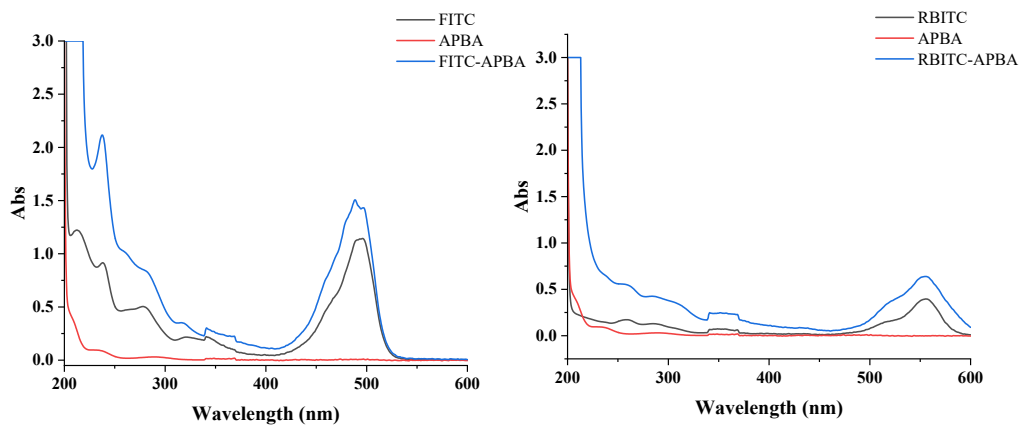

**Figure S1.** UV absorption spectra of FITC-APBA (left) and RBITC-APBA (right).

Fluorescent probe concentration: 0.5  $\mu\text{M}$ ; solvent: PBS (pH 8.0, 10 mM).

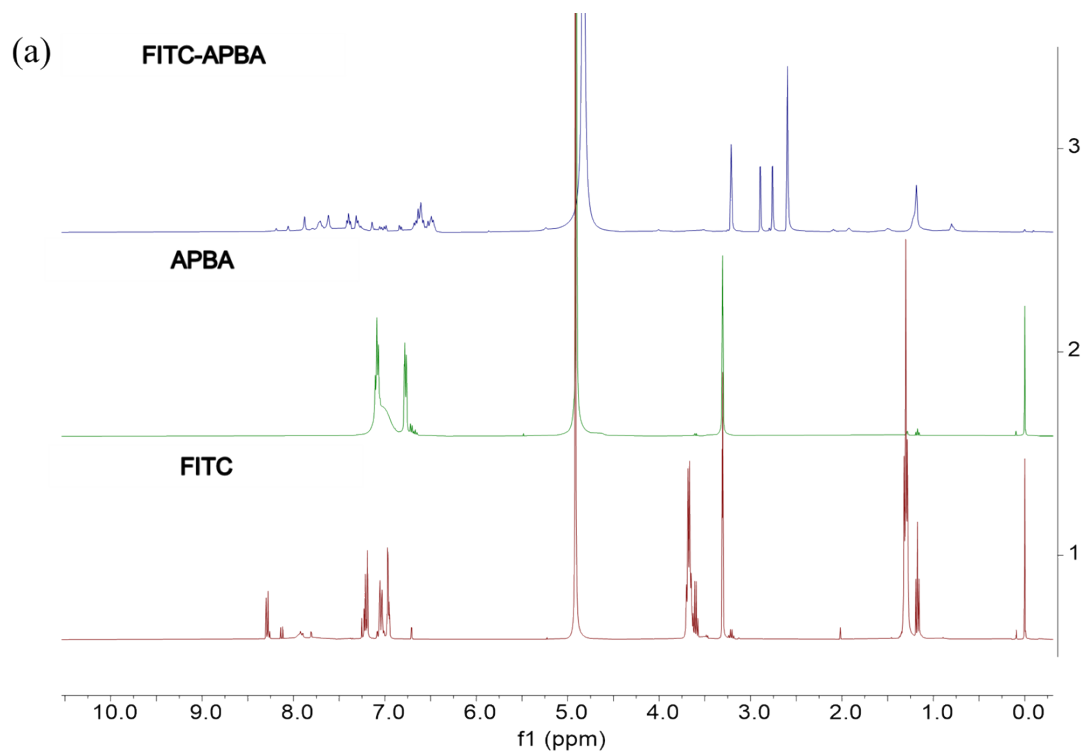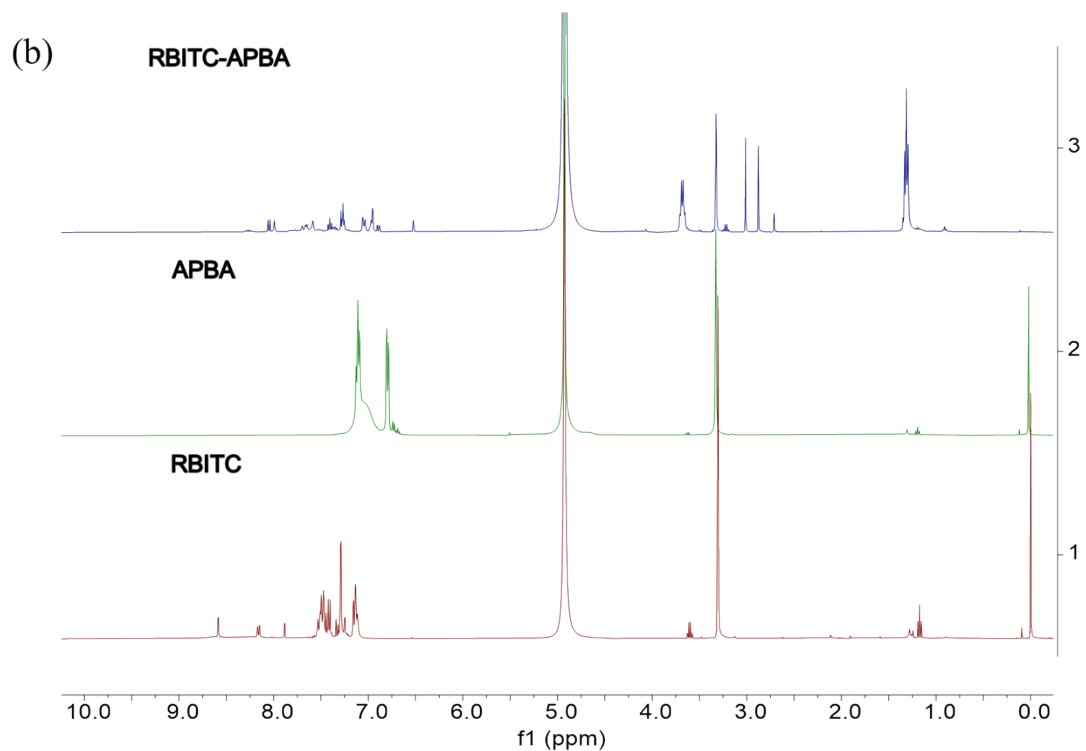

**Figure S2.**  $^1\text{H}$  NMR spectra of FITC-APBA (a) and RBITC-APBA (b) comparing with that of their corresponding substrates.

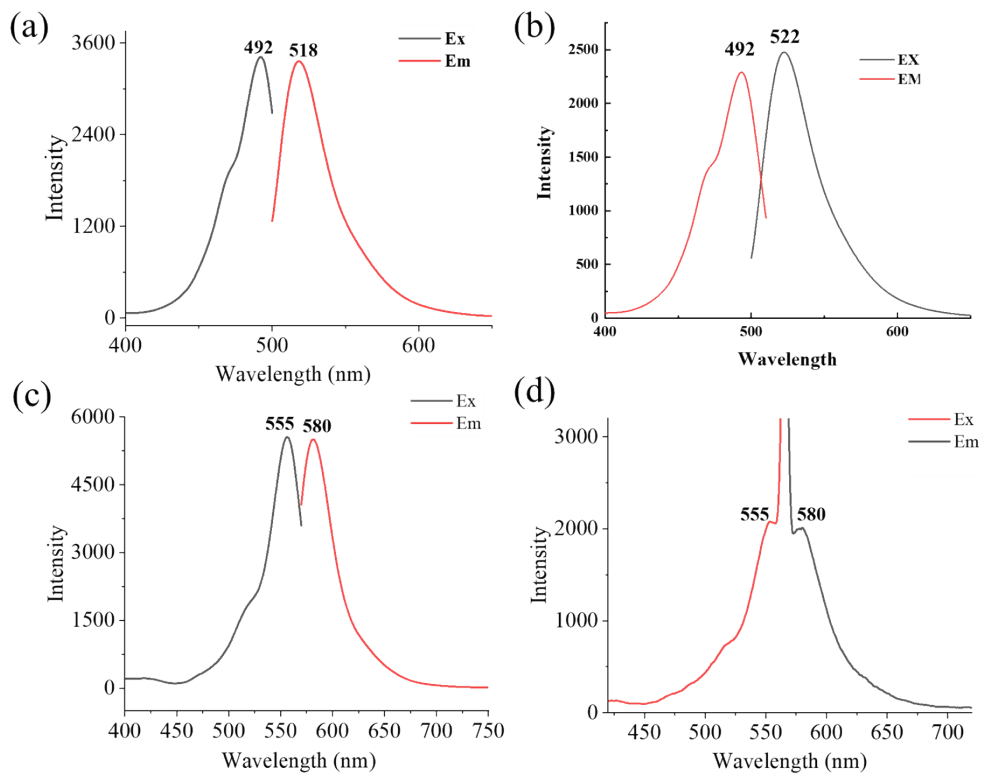

**Figure S3.** Fluorescence spectra of FITC (a), FITC-APBA (b), RBITC (c) and RBITC-APBA (d). Fluorescent probe concentration: 0.5  $\mu$ M; solvent: PBS (pH 8.0, 10 mM).

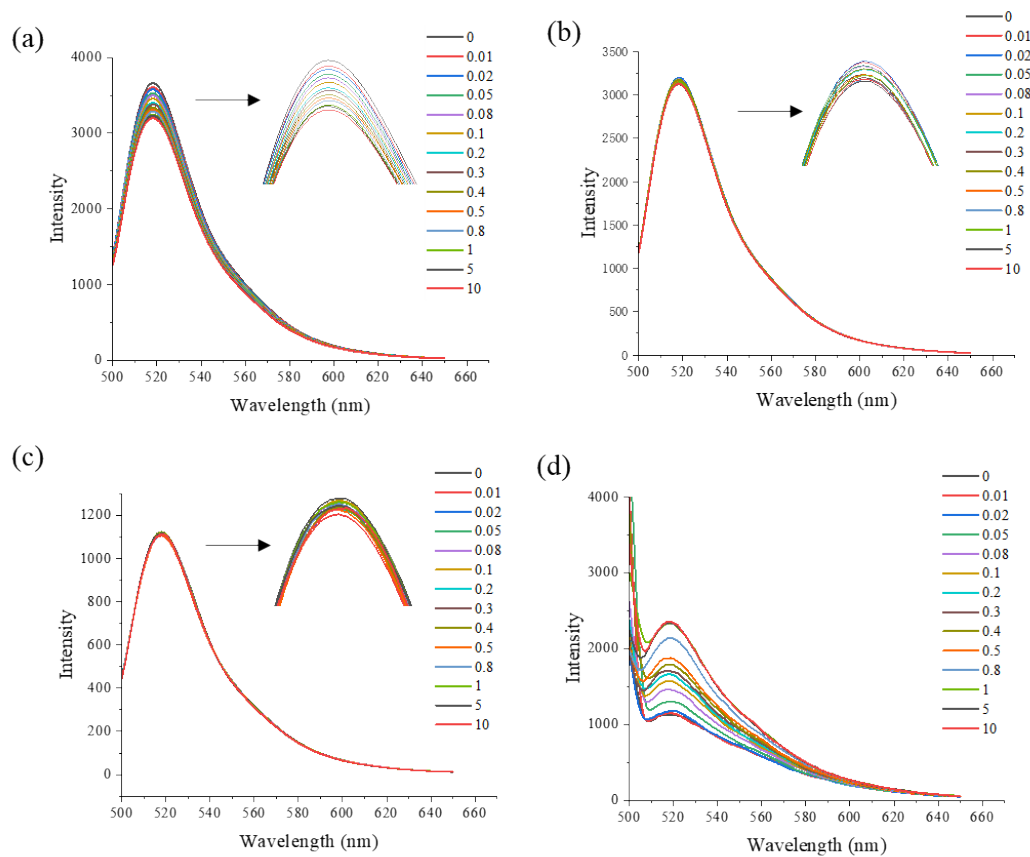

**Figure S4.** Dose-fluorescence spectra of FITC-APBA in the co-solvents of PBS/MeOH = 7/3 (v/v) with pH value of 8.0 (a), 7.4 (b), 6.0 (c) and 4.0 (d). Testing molecule: adenosine; FITC-APBA concentration: 0.1  $\mu\text{M}$ .

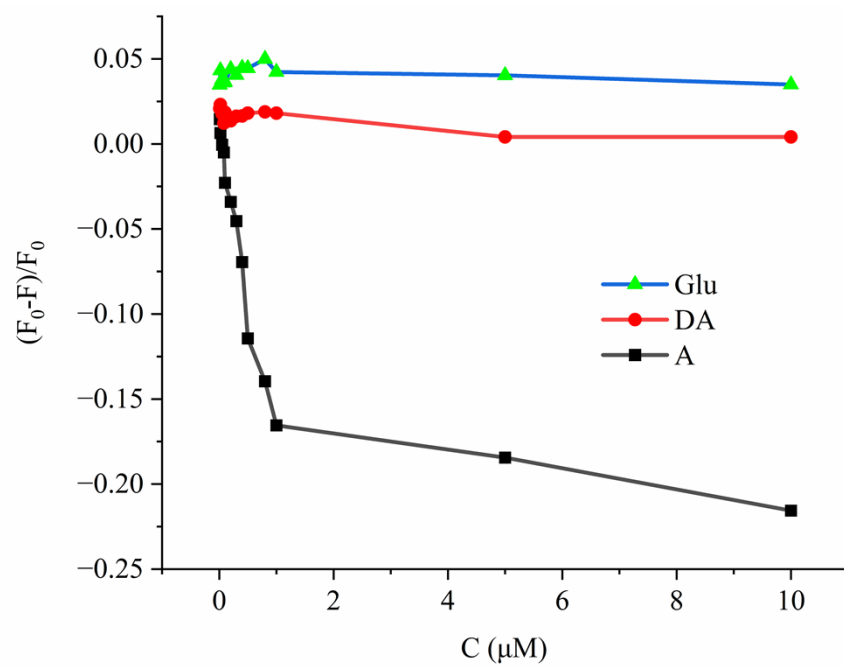

**Figure S5.** Dose-fluorescence spectra of FITC-APBA in the co-solvents of PBS/MeOH = 7/3 (v/v) with pH value of 4.0 to adenosine, deoxyadenosine and glucose. FITC-APBA concentration: 0.1  $\mu\text{M}$ .

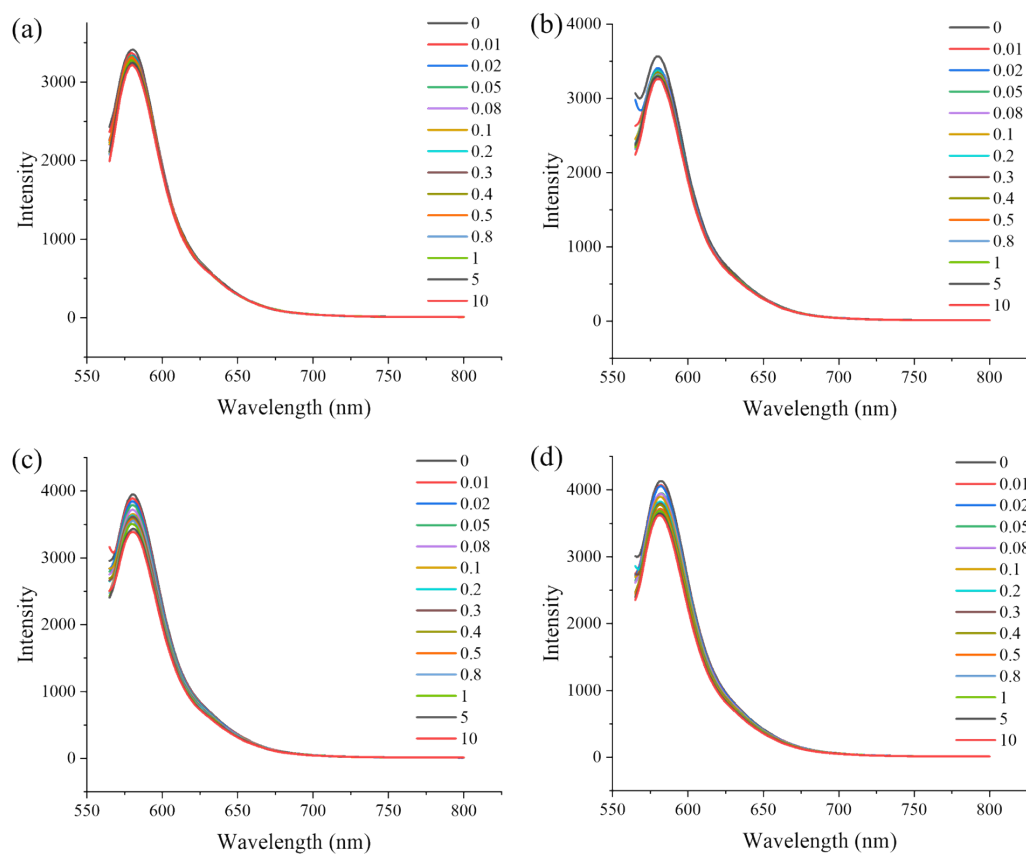

**Figure S6.** Dose-fluorescence spectra of RBITC-APBA in the co-solvents of PBS/MeOH = 7/3 (v/v) with pH value of 8.0 (a), 7.4 (b), 6.0 (c) and 4.0 (d). Testing molecule: adenosine; RBITC-APBA concentration: 0.5  $\mu$ M.

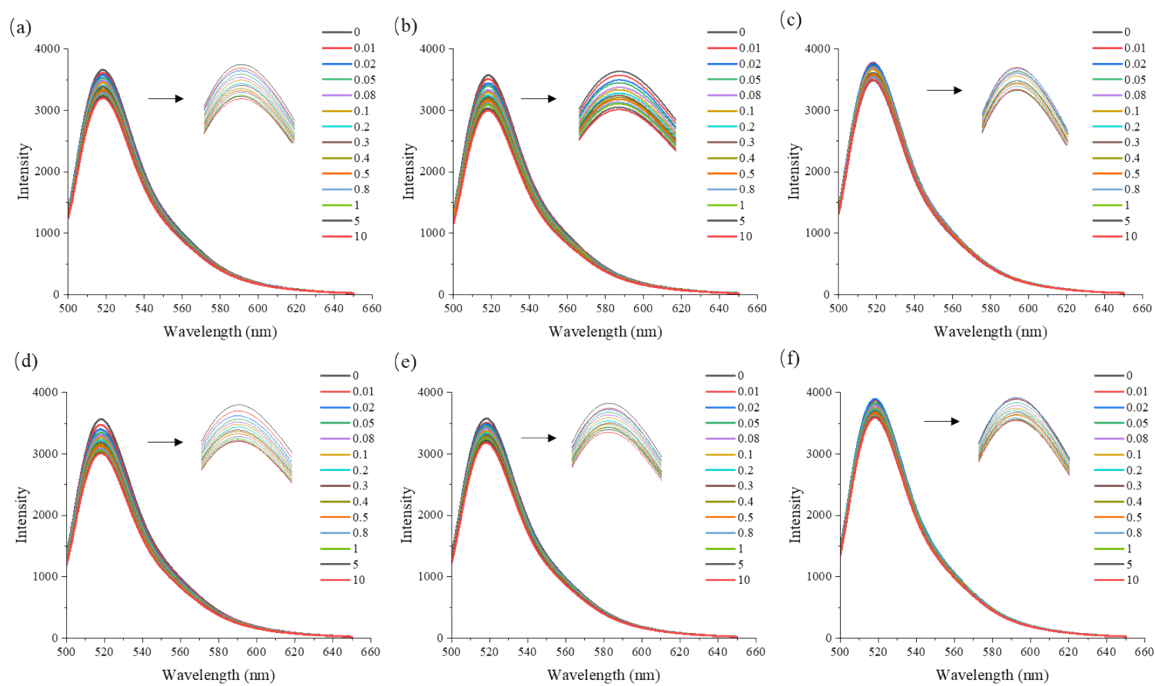

**Figure S7.** Dose-fluorescence spectra of FITC-APBA (0.1  $\mu\text{M}$ ) to nucleosides of A (a), G (b), C (c), U (d), DA (e), and AMP (f), in PBS (10 mM, pH 8.0).

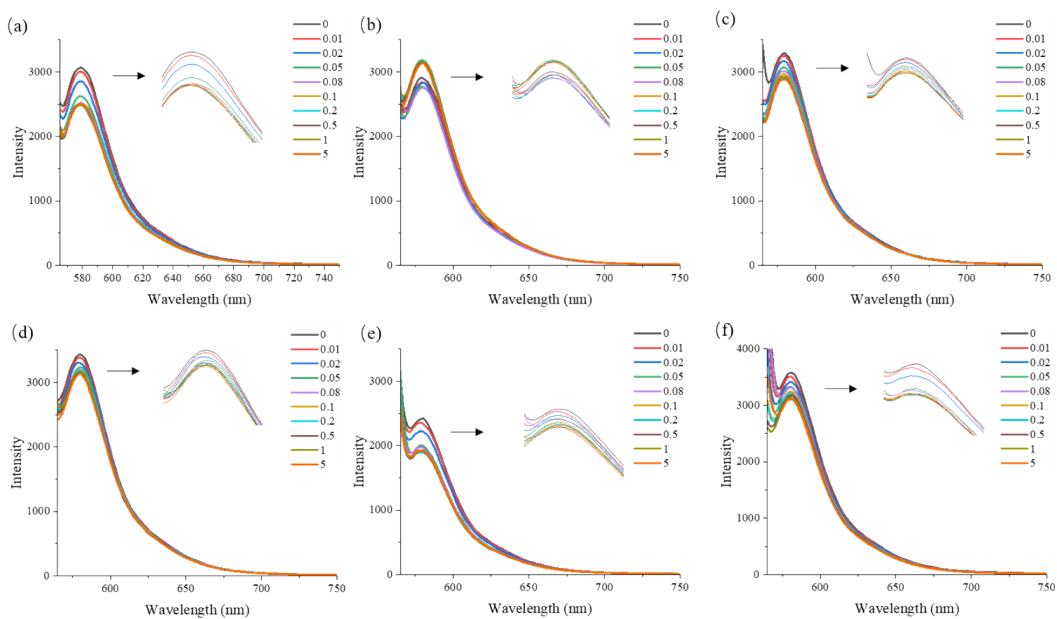

**Figure S8.** Dose-fluorescence spectra of RBITC-APBA (0.5  $\mu\text{M}$ ) to nucleosides of A (a), G (b), C (c), U (d), DA (e), and AMP (f), in PBS (10 mM, pH 8.0)/MeOH = 7/3 (v/v).



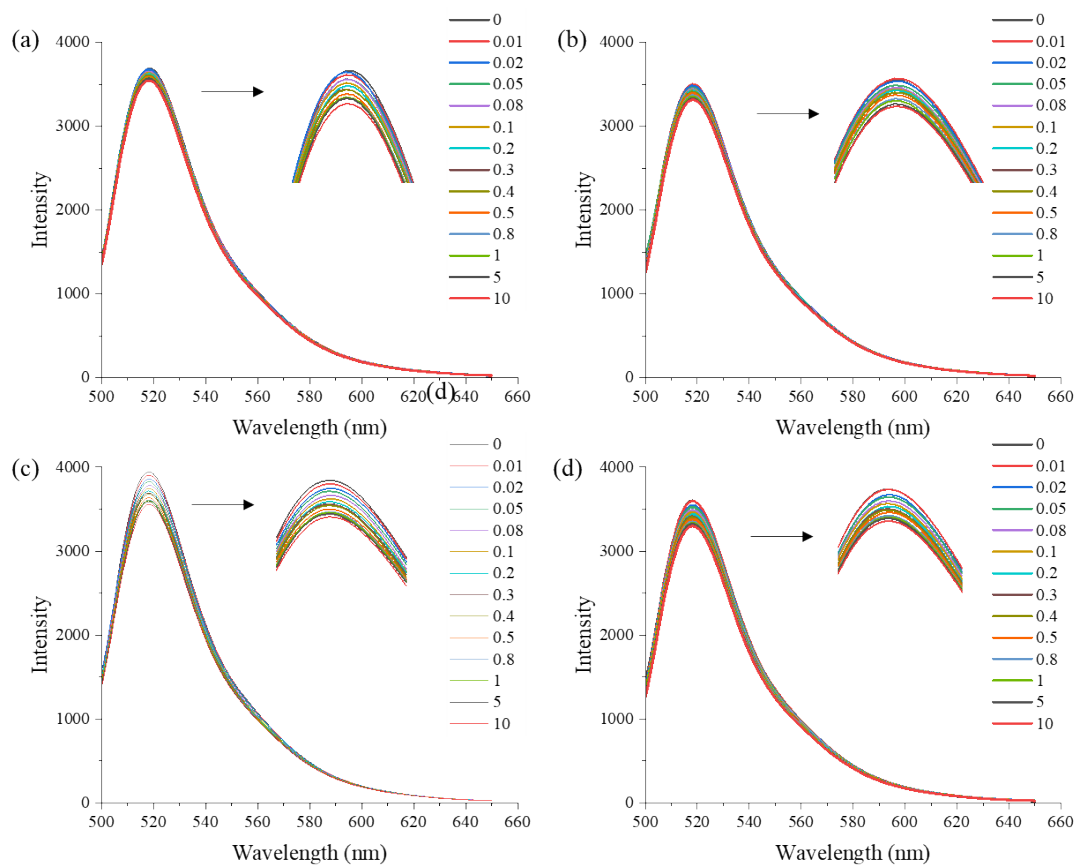

**Figure S9.** Dose-fluorescence spectra of FITC-APBA (0.1  $\mu\text{M}$ ) to monosaccharides of Glu (a), Fru (b), Gal (c), and Man (d), in PBS (10 mM, pH 8.0).

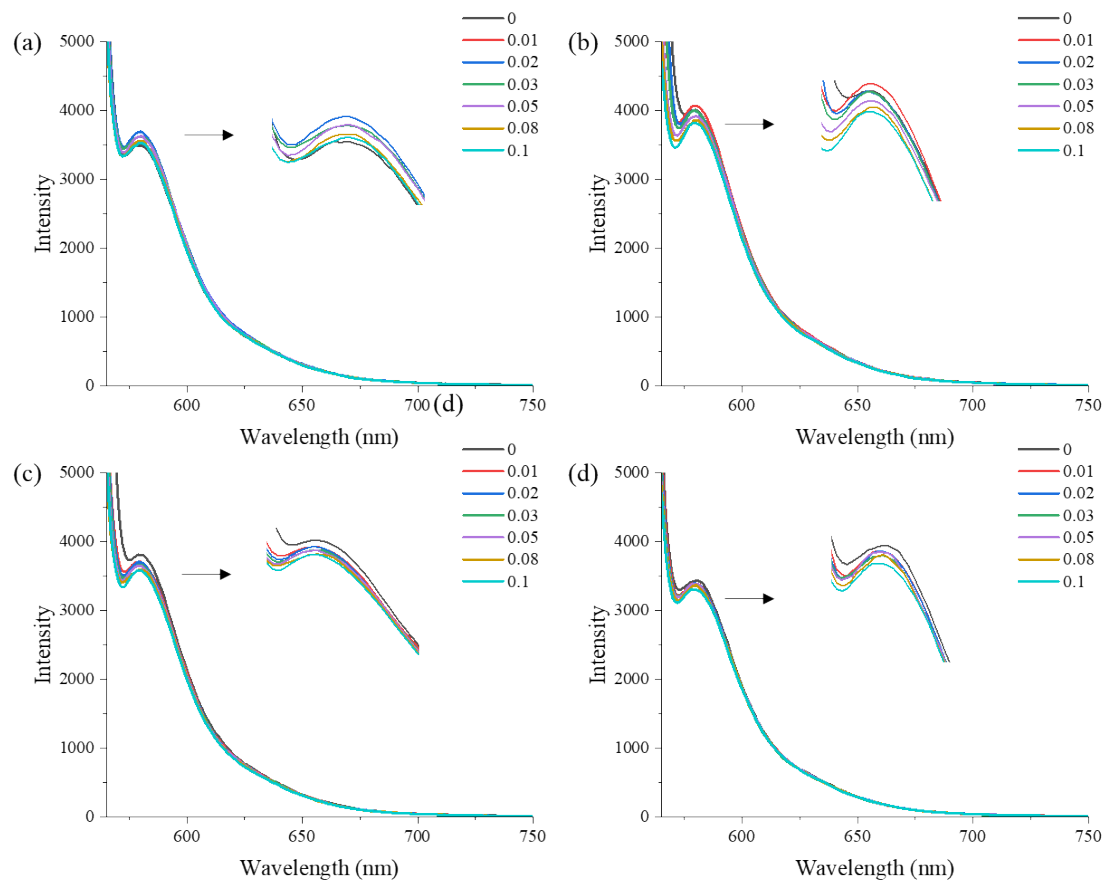

**Figure S10.** Dose-fluorescence spectra of RBITC-APBA (0.5  $\mu\text{M}$ ) to monosaccharides of Glu (a), Fru (b), Gal (c), and Man (d), in PBS (10 mM, pH 8.0)/MeOH = 7/3 (v/v).

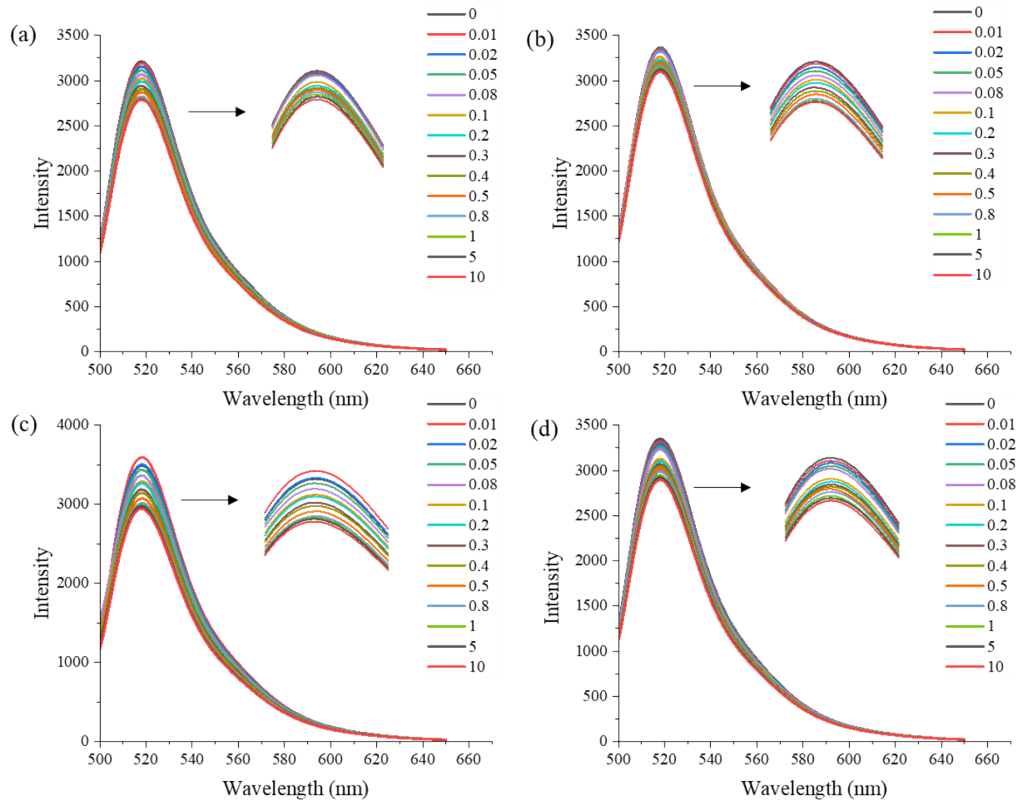

**Figure S11.** Dose-fluorescence spectra of FITC-APBA (0.1  $\mu\text{M}$ ) to proteins of HRP

(a), OVA (b), LF (c), and BSA (d), in PBS (10 mM, pH 8.0).

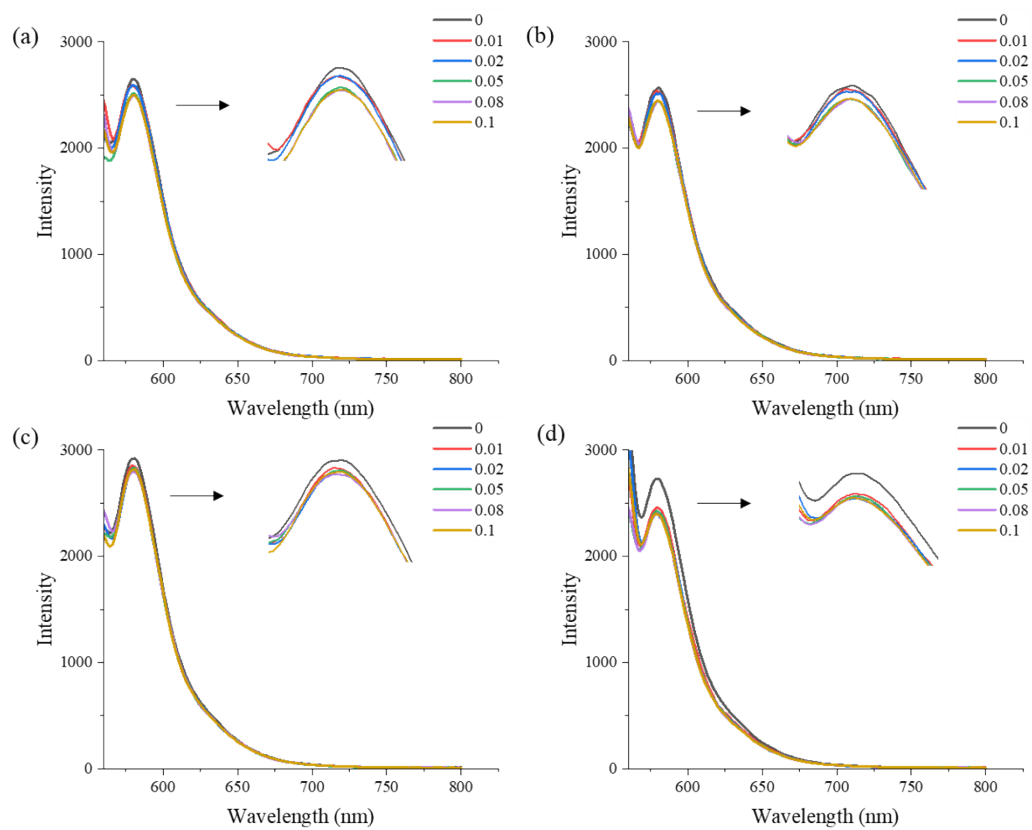

**Figure S12.** Dose-fluorescence spectra of RBITC-APBA ( $0.5 \mu\text{M}$ ) to proteins of HRP

(a), OVA (b), LF (c), and BSA (d), in PBS (10 mM, pH 8.0)/MeOH = 7/3 (v/v).

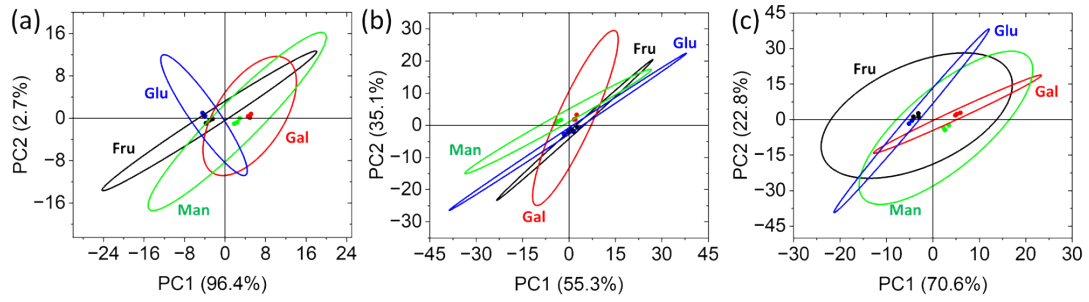

**Figure S13.** Principal component analysis of different sugars based on their dose-fluorescence responses, binding affinities, and molecular weights using FITC-APBA (a) and RBITC-APBA (b) and both of them (c).

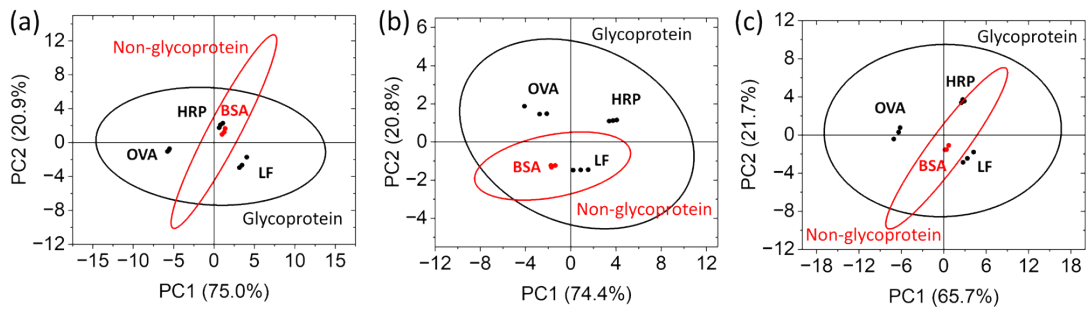

**Figure S14.** Principal component analysis of glycoprotein and non-glycoprotein based on their dose-fluorescence responses, binding affinities, and molecular weights using FITC-APBA (a) and RBITC-APBA (b) and both of them (c).
